# Supplementary material
Source: ML conference proceedings conference paper supplement (https://proceedings.neurips.cc/paper_files/paper/2022/hash/58be158bf831a706b1a66cffbc401cac-Abstract.html)
Supplement: Supplementary file 1 [file 58be158bf831a706b1a66cffbc401cac-Supplemental-Conference.zip]

Archive with 10 entries (9 files):
- code_submitted/
- code_submitted/exp_simu_varying_parameters.py
- code_submitted/crt_variants.R
- code_submitted/functions.py
- code_submitted/crt_variants.py
- code_submitted/exp_qqplot.py
- code_submitted/utils.py
- code_submitted/data_simulation.py
- code_submitted/__init.py__
- supmat.pdf
